# Supplementary material for: A dataset on the effect of exercise-conditioned human sera in three-dimensional breast cancer cell culture
Source: PubMed Central journal article supplement — Data Brief. 2019 Oct 21;27:104704. doi: 10.1016/j.dib.2019.104704 (PMC6838928; doi:10.1016/j.dib.2019.104704), 2019-10-21
Supplement: mmc1.pdf [file mmc1.pdf]

# A dataset on the effect of exercise-conditioned human sera in three-dimensional breast cancer cell culture

Mauro De Santi, Giulia Baldelli, Francesco Lucertini, Valentina Natalucci, Giorgio Brandi, Elena Barbieri

## Supplementary information

Explicative images of three-dimensional in vitro culture in soft agar. Cells ( $1 \times 10^3$ ) were cultured in the central layer of agar (0.3% agar) for 18 days and stained with 0.01% crystal violet.

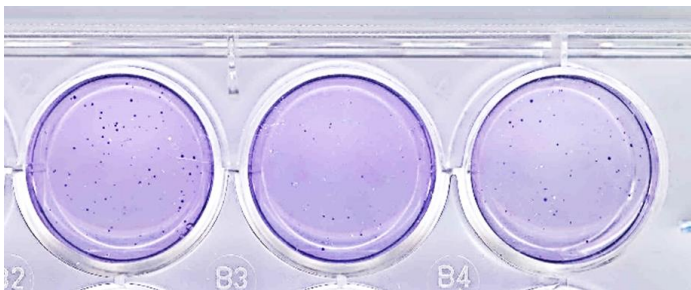

1:1 photograph

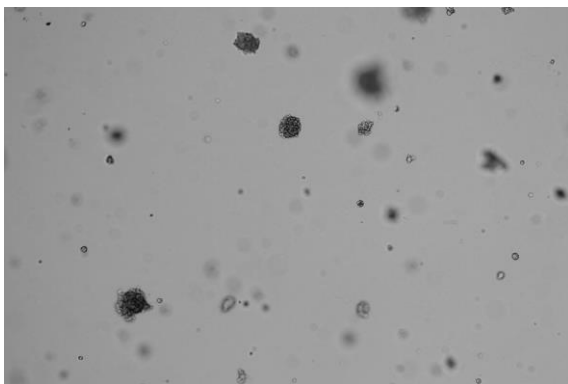

Microscope image: 5 x magnification

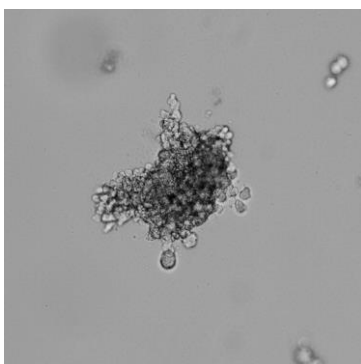

Microscope image: 20 x magnification
